# Supplementary material for: Apta-sensor for selective determination of dopamine using chitosan-stabilized Prussian blue nanoparticles
Source: Royal Society of Chemistry journal article supplement (doi:10.1039/d3tb00799e), 2023-01-01
Supplement: d3tb00799e1.pdf [file d3tb00799e1.pdf]

**Supplementary Information**

**Apta-Sensor for Selective Determination of  
Dopamine Using Chitosan-Stabilized Prussian  
Blue Nanoparticles**

Han Been Lee, Seong Eun Son, and Gi Hun Seong\*

Department of Bionano Engineering, Center for Bionano Intelligence Education and  
Research, Hanyang University, Ansan 426-791, South Korea

\*Corresponding author:

Gi Hun Seong

Email: [ghseong@hanyang.ac.kr](mailto:ghseong@hanyang.ac.kr)

Tel.: +82-31-400-5202

**List of supplementary data**

- **Michaelis-Menten and Lineweaver-Burk double reciprocal equations .....S-3**
- **Figures S1-S4.....S-4**

## Michaelis-Menten and Lineweaver-burk double reciprocal Equations

### I. Michaelis-Menten equation

$$V_0 = \frac{V_{max}[S]}{K_m + [S]}$$

### II. Lineweaver-Burk double reciprocal Equation

$$\frac{1}{V} = \frac{K_m}{V_{max}[S]} + \frac{1}{V_{max}}$$

Where  $V_0$  indicates the initial velocity and  $V_{max}$  is maximum reaction velocity. The  $[S]$  is concentration of substrate and  $K_m$  is Michaelis-Menten constant.

### III. Turnover number ( $K_{cat}$ )

$$K_{cat} = \frac{V_{max}}{[E]}$$

Where  $[E]$  means the enzyme concentration.

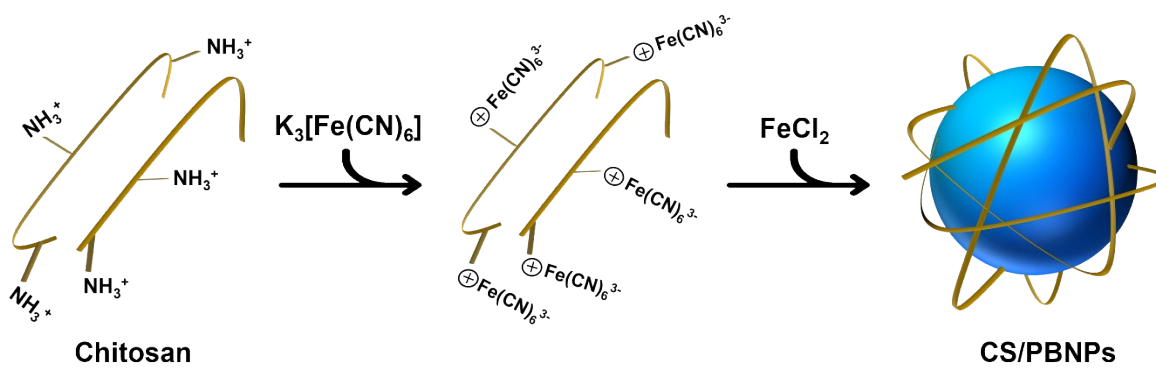

**Fig. S1.** Schematic illustration for the synthesis of CS/PBNPs

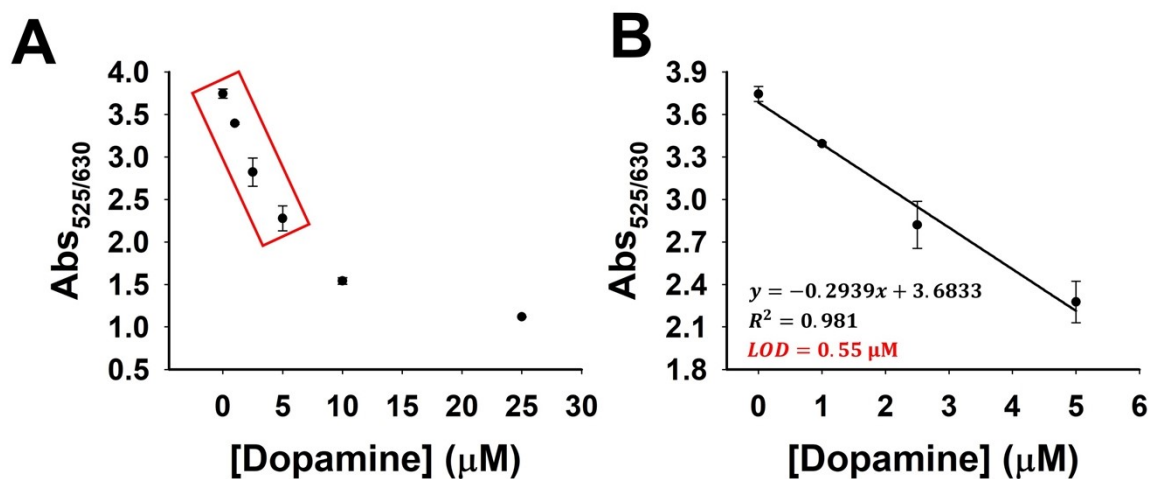

**Fig. S2.** (A) Colorimetric calibration curves for the change of the absorbance ratio of the AuNPs for DA concentrations (0-25  $\mu M$ ). (B) Linear relationship between DA concentrations (0-5  $\mu M$ ) and  $Abs_{525/630}$ .

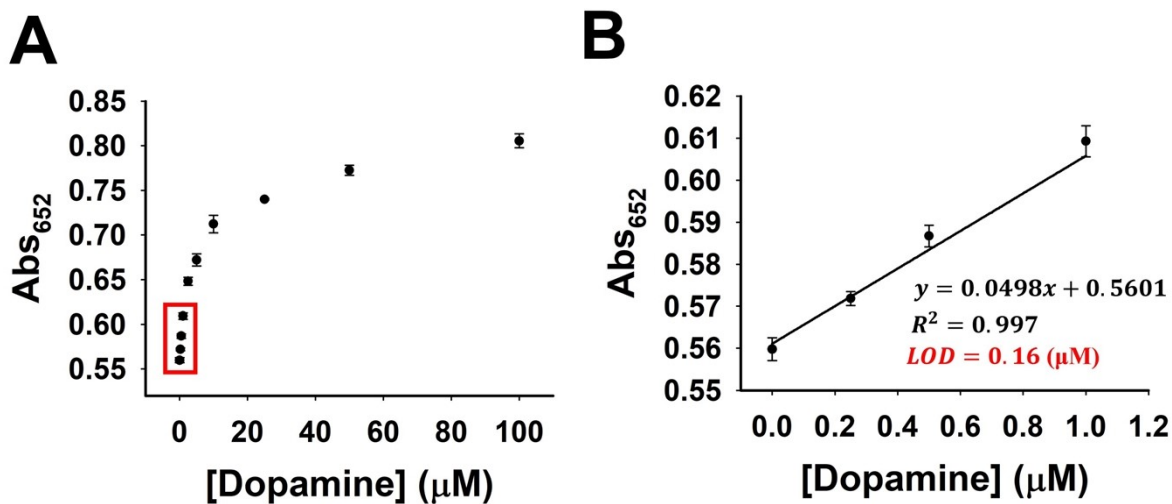

**Fig. S3.** (A) Plot of absorbance vs DA concentrations (0-100 μM). (B) Linear relationship between the absorbance and DA concentrations (0-1 μM).

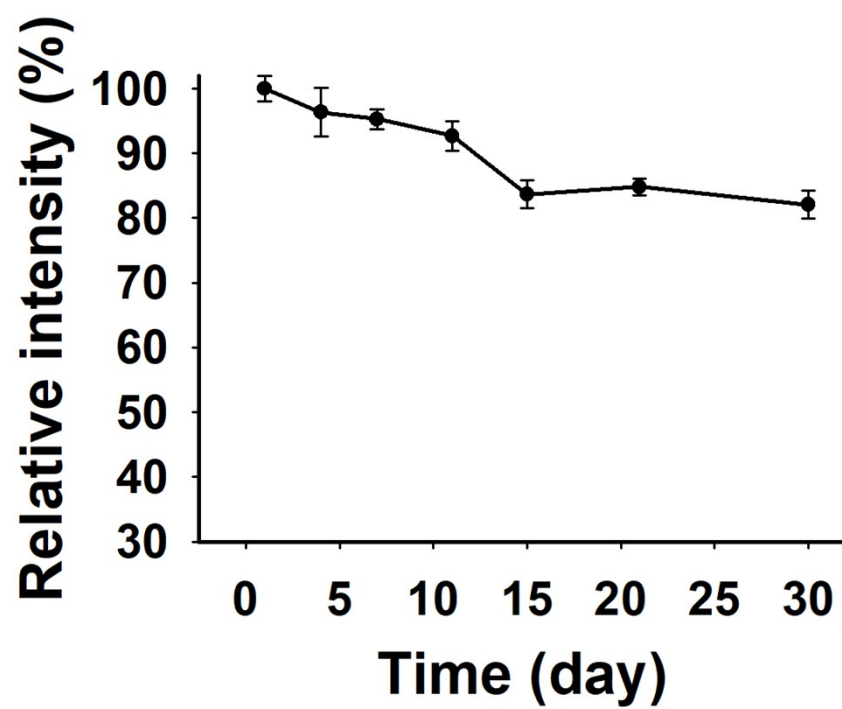

**Fig. S4.** Long-term stability of CS/PBNPs/DBA.
